# Supplementary material
Source: publisher figshare collection journal article supplement (https://acs.figshare.com/ndownloader/files/4213744)
Supplement: Supplementary file 1 [file 4213744]

# Dephosphorylation reactions with deferoxamine, a potential chemical nuclease

Elisa S. Orth<sup>†</sup>, Michelle Medeiros<sup>†</sup>, Tiago Bortolotto<sup>‡</sup>, Hernán Terenzi<sup>‡</sup>, Anthony J. Kirby<sup>§</sup> and Faruk Nome<sup>†\*</sup>.

<sup>†</sup> INCT-Catálise, Departamento de Química, Universidade Federal de Santa Catarina, Campus Universitário – Trindade, 88040-900 Florianópolis, SC, Brasil · <sup>‡</sup> Departamento de Bioquímica, Universidade Federal de Santa Catarina, Campus Universitário – Trindade, 88040-900 Florianópolis, SC, Brasil. <sup>§</sup> University Chemical Laboratory, Cambridge CB2 1EW, UK.

## Electronic Supporting Information

|                                                                                                                                                                           |           |
|---------------------------------------------------------------------------------------------------------------------------------------------------------------------------|-----------|
| <b>1. Kinetic data</b>                                                                                                                                                    | <b>S2</b> |
| <b>Table S.1.</b> Rate constants as a function of pH for the reaction of 0.01M <b>DFO</b> with <b>BDNPP</b> at 25.0°C in water, $\mu = 1.0$ M (KCl).                      | <b>S2</b> |
| <b>2. ESI-MS spectrometry</b>                                                                                                                                             | <b>S3</b> |
| <b>Figure S2.</b> ESI-MS (-) after 30 min of reaction of <b>BDNPP</b> with <b>DFO</b> in aqueous solution at pH 10 and 25°C.                                              | <b>S3</b> |
| <b>Scheme S3.</b> ESI-MS/MS fragment assignments for <b>BDNPP</b> of m/z 429, <b>DFO</b> of m/z 559 and the proposed phosphorylated intermediates of m/z 805 and m/z 885. | <b>S3</b> |
| <b>Figure S4.</b> ESI-MS/MS of the reagent <b>BDNPP</b> of m/z 429.                                                                                                       | <b>S5</b> |
| <b>Figure S5.</b> ESI-MS/MS of the reagent <b>DFO</b> of m/z 559.                                                                                                         | <b>S5</b> |

## 1. Kinetic data

**Table S.1.** Rate constants as a function of pH for the reaction of **DFO** with **BDNPP** at 25.0°C in water,  $\mu = 1.0$  M (KCl).

| pH   | $10^2 k_2, \text{M}^{-1}\text{s}^{-1}$ |
|------|----------------------------------------|
| 7.07 | 0.0145                                 |
| 7.47 | 0.0183                                 |
| 8.01 | 0.0576                                 |
| 8.51 | 0.185                                  |
| 9.04 | 0.627                                  |
| 9.30 | 1.22                                   |
| 9.52 | 1.69                                   |
| 9.70 | 2.10                                   |
| 9.80 | 2.45                                   |
| 9.98 | 2.75                                   |
| 10.2 | 3.08                                   |
| 10.3 | 3.39                                   |
| 10.5 | 3.61                                   |
| 10.6 | 3.68                                   |
| 10.9 | 3.82                                   |
| 11.1 | 3.89                                   |
| 11.3 | 3.89                                   |
| 11.5 | 3.90                                   |

## 2. ESI-MS spectrometry

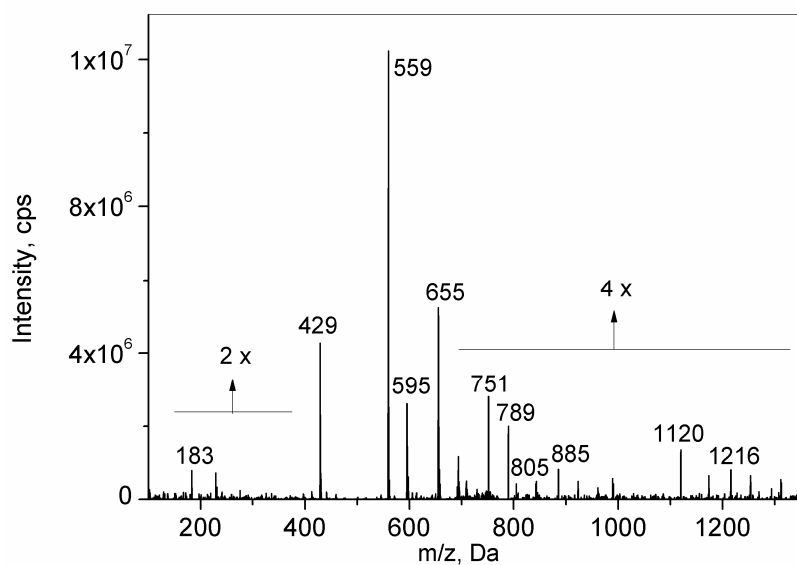

**Figure S2.** ESI-MS (-) after 30 min of reaction of **BDNPP** with **DFO** in aqueous solution at pH 10 and 25°C.

**Scheme S3.** ESI-MS/MS fragment assignments for **BDNPP** of m/z 429, **DFO** of m/z 559 and the proposed phosphorylated intermediates of m/z 805 and m/z 885.

### a. m/z fragments for **BDNPP** of m/z 429

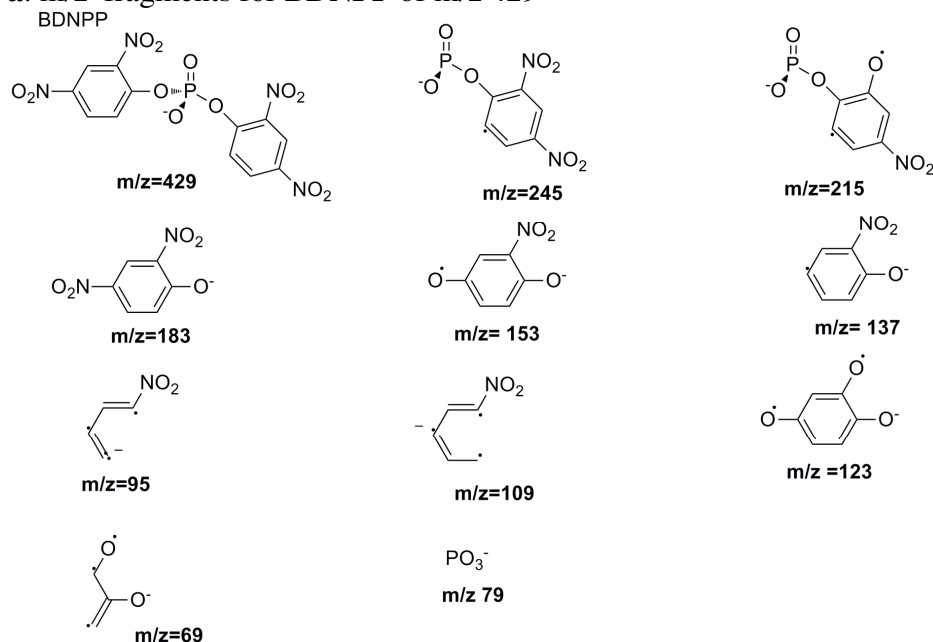

**b. m/z fragments for DFO of m/z 559**

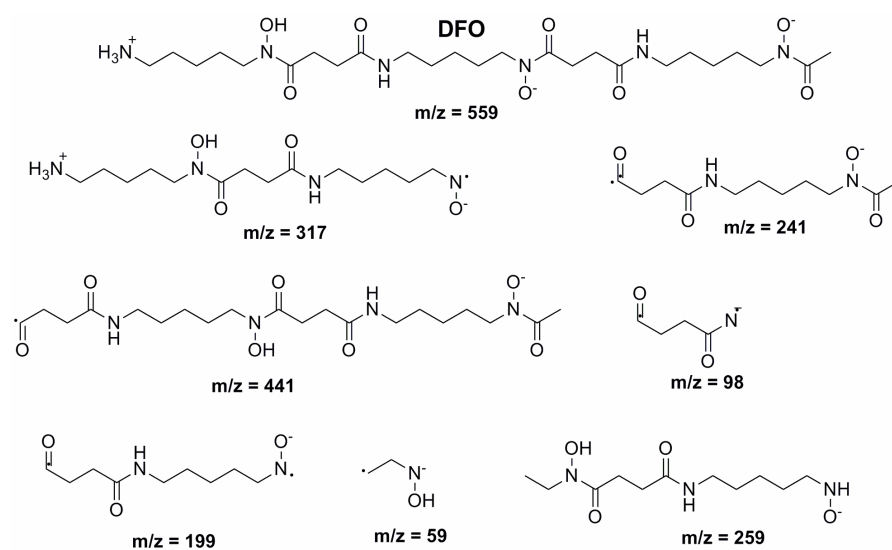

**c. m/z fragments for m/z 805**

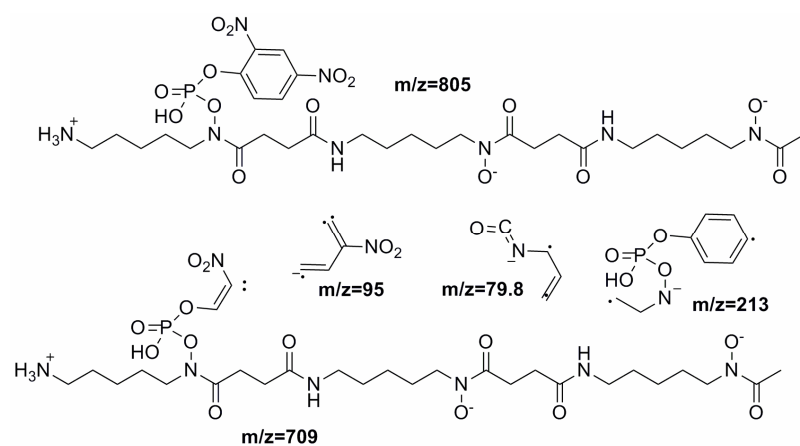

**d. m/z fragments for m/z 885**

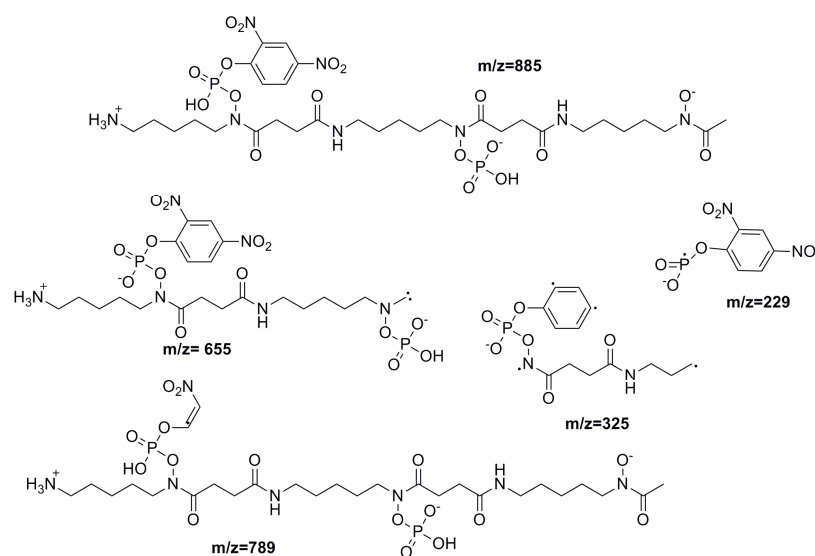

The reactant **BDNPP** of  $m/z$  429 dissociates to the fragments of  $m/z$  245, 215, 183, 153, 137, 123, 109, 94.9 and 78.8 (**Figure S4, Scheme S3**), which are mainly due to losses of the nitro groups and ring opening reactions. Furthermore, **DFO** of  $m/z$  559 dissociates to the fragments of  $m/z$  441, 317, 259, 241, 199, 161, 155, 136, 97.9 and 58.9 (**Figure S5, Scheme S3**) and the fragments are consistent with multiple cleavages of the **DFO** anion, consistent with its complex and relatively large structure. The ESI-MS/MS of **BDNPP** and **DFO** were helpful in providing information about the nature of the phosphorylated intermediates.

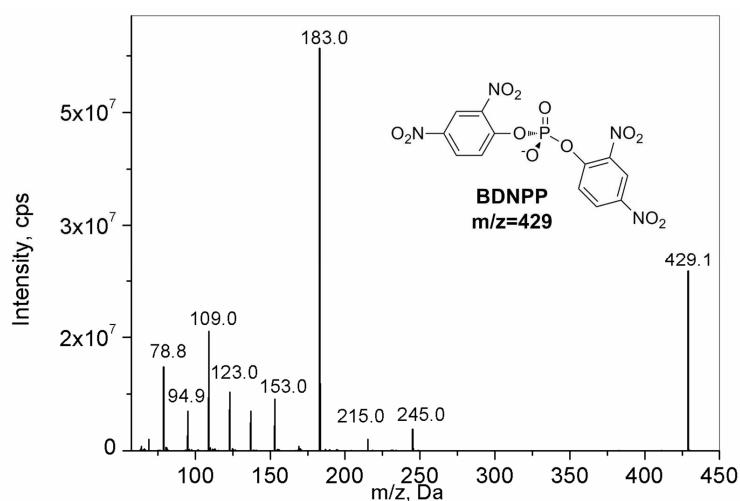

**Figure S4.** ESI-MS/MS of the reagent **BDNPP** of  $m/z$  429.

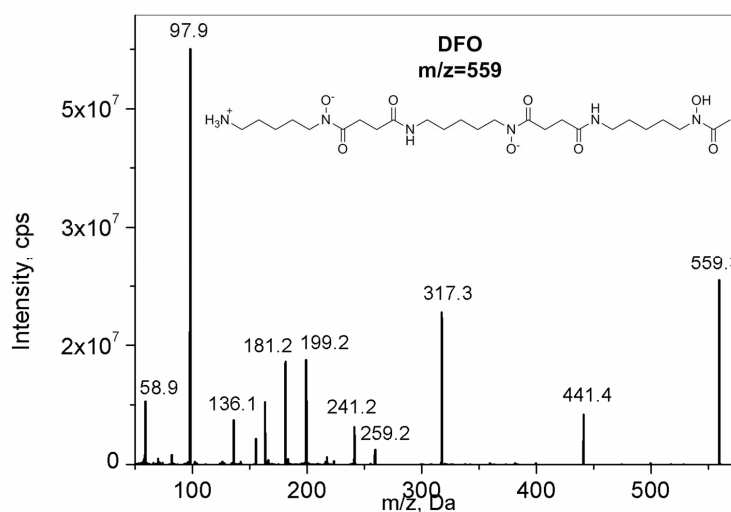

**Figure S5.** ESI-MS/MS of the reagent **DFO** of  $m/z$  559.
